# Supplementary material for: MXene composite with Ni/Co sulfide for enhanced hydrogen evolution reaction
Source: Royal Society of Chemistry journal article supplement (doi:10.1039/d4qm00095a), 2024-01-01
Supplement: d4qm00095a1.pdf [file d4qm00095a1.pdf]

## Supporting Information

### **MXene composite with Ni/Co sulfide for enhanced hydrogen evolution reaction**

Mohit Kumar<sup>†</sup>, Bhimanaboina Ramulu<sup>†</sup>, and Jae Su Yu<sup>\*</sup>

Department of Electronics and Information Convergence Engineering, Institute for Wearable Convergence Electronics, Kyung Hee University, 1732 Deogyong-daero, Giheung-gu, Yongin-si, Gyeonggi-do 17104, Republic of Korea

<sup>\*</sup>Corresponding author. E-mail address: [jsyu@khu.ac.kr](mailto:jsyu@khu.ac.kr) (J. S. Yu)

<sup>†</sup> These authors equally contributed to this work.

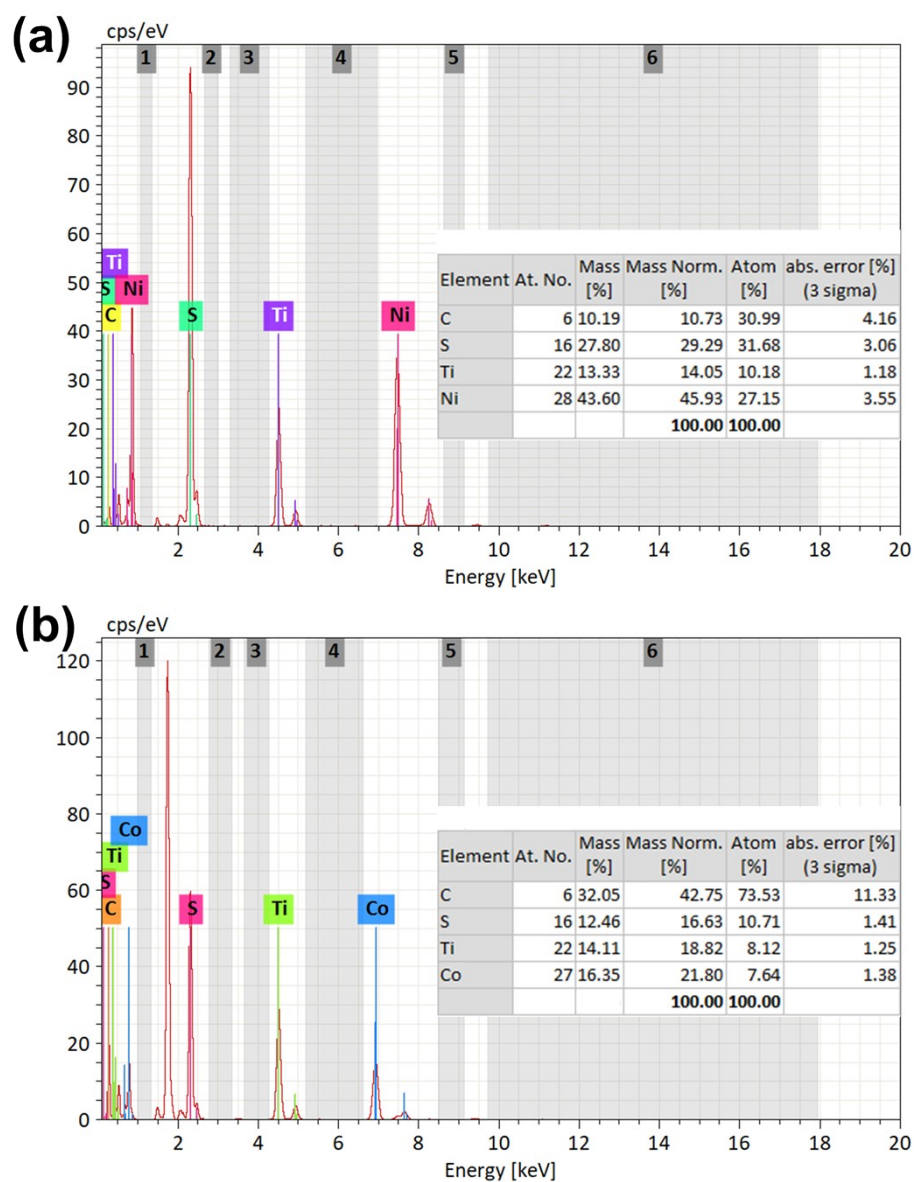

**Fig. S1.** EDS spectra of the (a)  $\text{Ti}_3\text{C}_2@\text{NiS}$  and (b)  $\text{Ti}_3\text{C}_2@\text{Co}_4\text{S}_3$  materials.

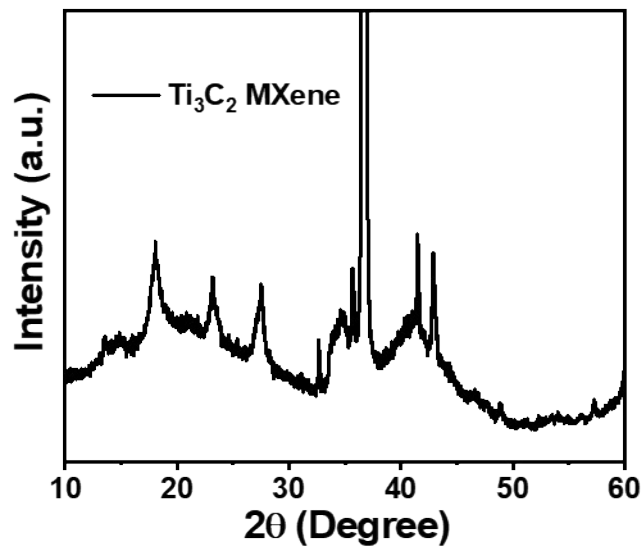

**Fig. S2.** XRD pattern of the  $\text{Ti}_3\text{C}_2$  Mxene material.

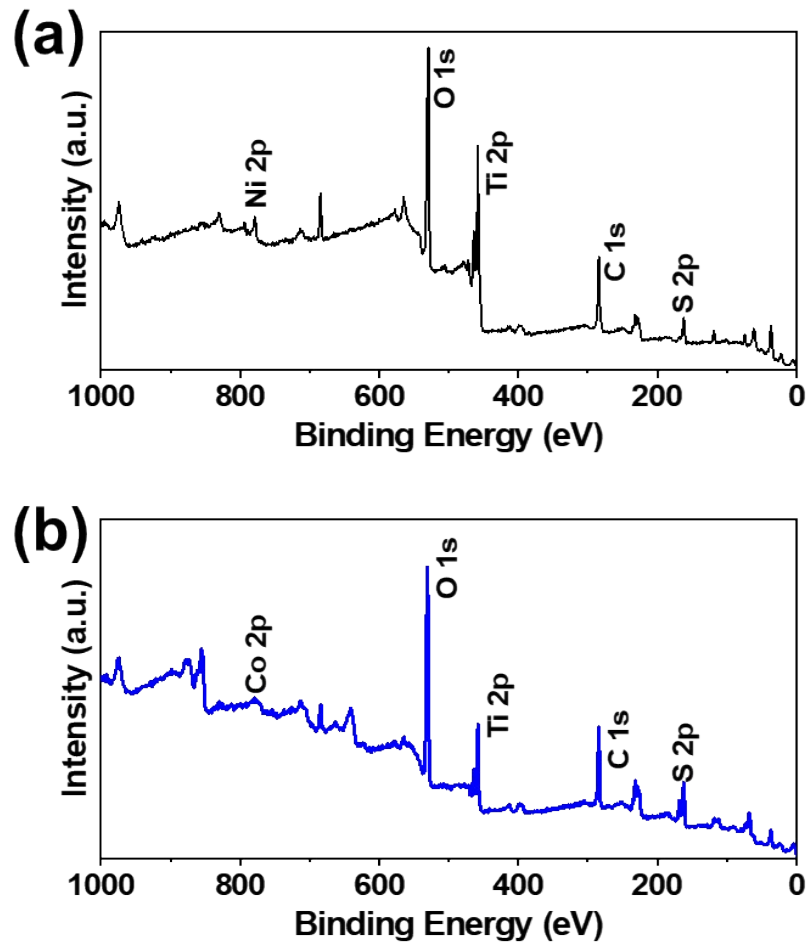

**Fig. S3.** XPS survey scan spectra of the (a)  $\text{Ti}_3\text{C}_2$  Mxene@NiS and (b)  $\text{Ti}_3\text{C}_2$  Mxene@ $\text{Co}_3\text{S}_4$  materials.

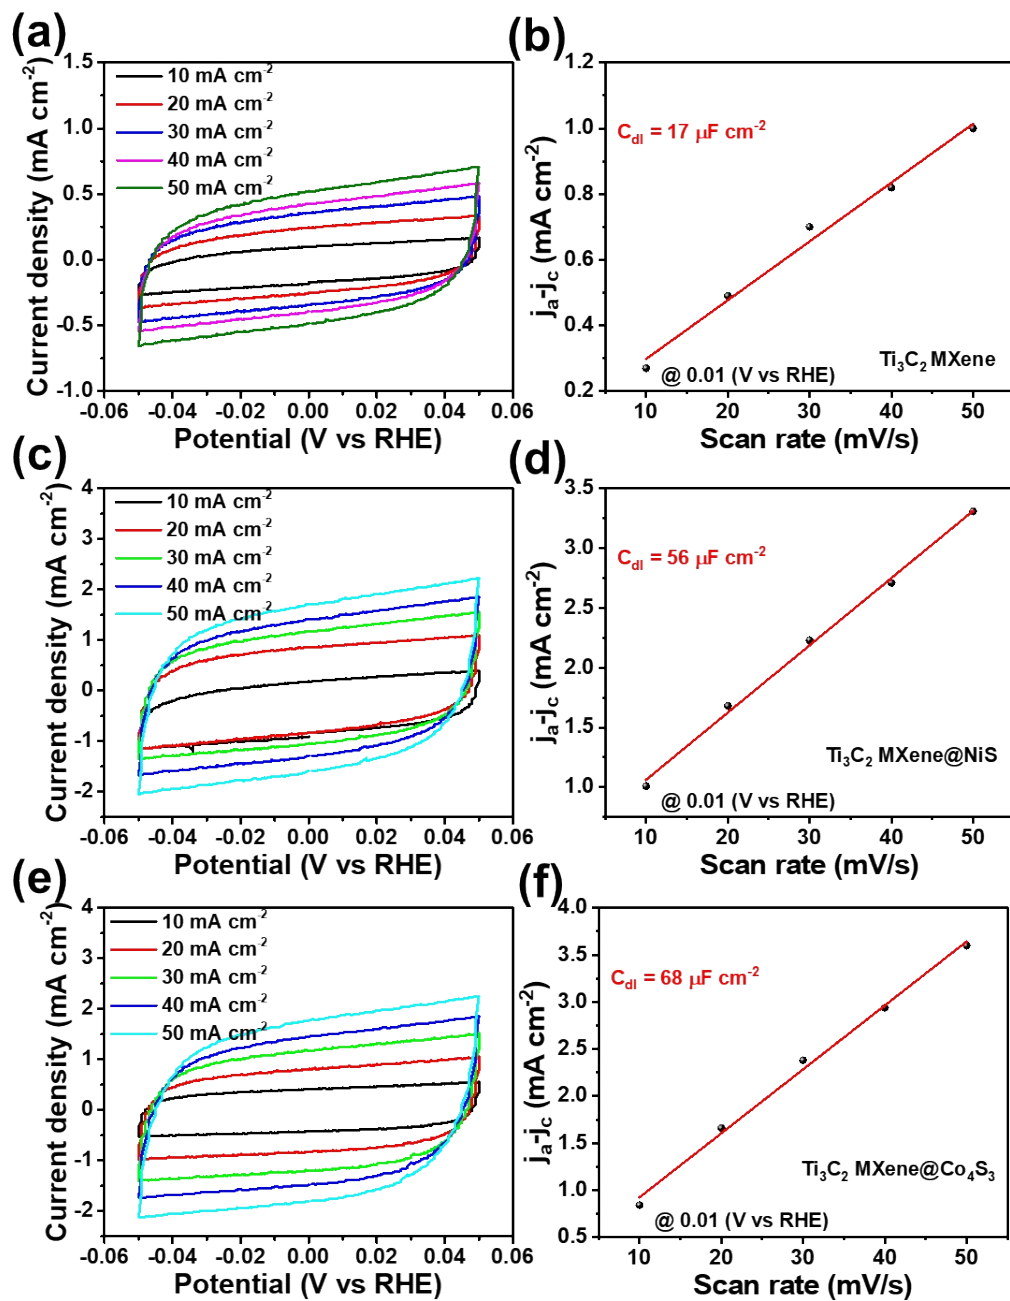

**Fig. S4.** CV curves measured in the non-faradaic region and corresponding double-layer capacitance data of the (a,b)  $Ti_3C_2$  MXene, (c,d)  $Ti_3C_2$  MXene@NiS, and (e,f)  $Ti_3C_2$  MXene@ $Co_4S_3$  materials.

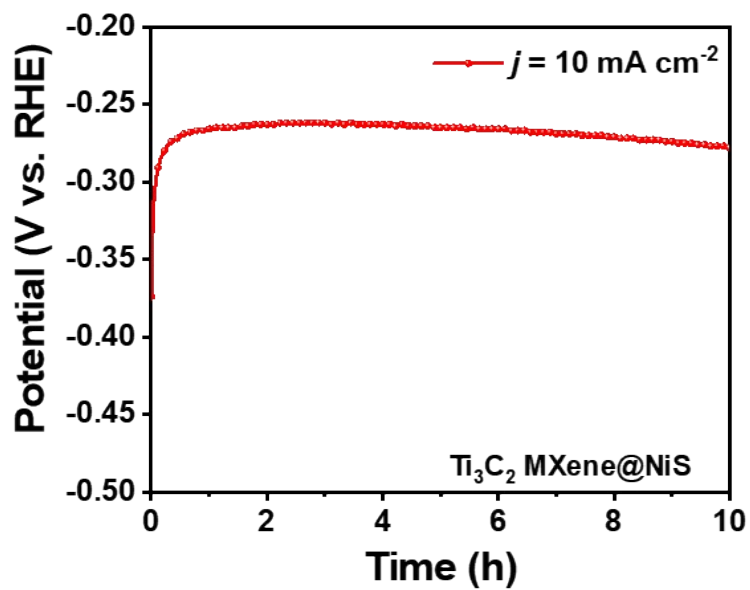

Fig. S5. Long-term stability test result for the  $\text{Ti}_3\text{C}_2 \text{ MXene@NiS}$  catalyst.

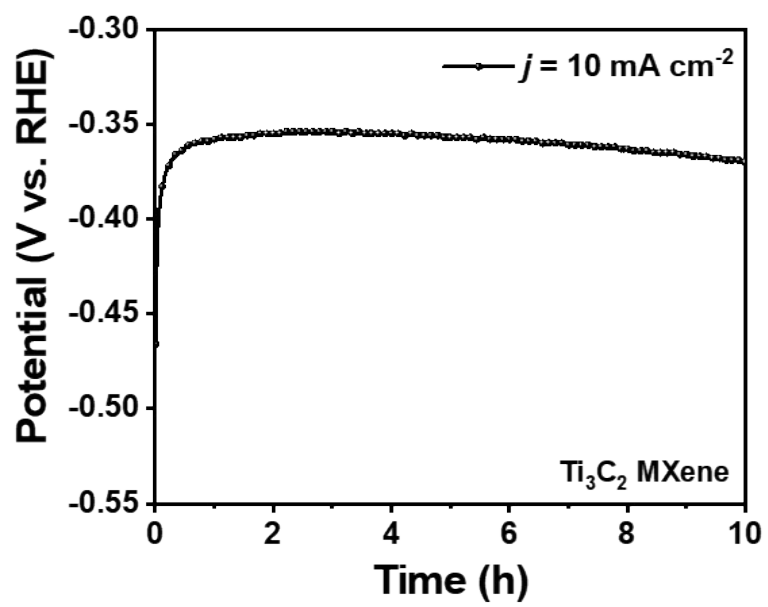

**Fig. S6.** Long-term stability test result for the  $\text{Ti}_3\text{C}_2$  MXene catalyst.
